# Supplementary material
Source: PubMed Central journal article supplement (PMC4723758)
Supplement: ijcem0008-20014-f7.pdf [file ijcem0008-20014-f7.pdf]

## STAT3/pSTAT3 predicts prognosis of gastric cancer

**Table S1.** Quality assessment details of each included study according to REMARK guidelines

| Study       | Scale items |   |   |   |   |   |   |   |   |    |    |    |    |    |    |    |    |    | Quality score |
|-------------|-------------|---|---|---|---|---|---|---|---|----|----|----|----|----|----|----|----|----|---------------|
|             | 1           | 2 | 3 | 4 | 5 | 6 | 7 | 8 | 9 | 10 | 11 | 12 | 13 | 14 | 15 | 16 | 17 | 18 |               |
| Chaterjee D | 1           | 1 | 1 | 1 | 1 | 1 | 0 | 1 | 1 | 1  | 1  | 0  | 0  | 1  | 1  | 1  | 0  | 0  | 13            |
| Deng J 2013 | 1           | 1 | 1 | 1 | 1 | 1 | 0 | 1 | 1 | 1  | 1  | 1  | 0  | 1  | 1  | 1  | 1  | 0  | 15            |
| Gong W      | 1           | 1 | 1 | 1 | 1 | 1 | 0 | 1 | 1 | 1  | 1  | 1  | 0  | 1  | 1  | 1  | 1  | 0  | 15            |
| Kim DY      | 1           | 1 | 0 | 1 | 0 | 1 | 1 | 1 | 1 | 1  | 1  | 1  | 0  | 1  | 1  | 1  | 0  | 0  | 13            |
| InoKuki M   | 1           | 1 | 1 | 1 | 0 | 1 | 0 | 0 | 1 | 1  | 1  | 1  | 0  | 1  | 0  | 1  | 1  | 0  | 12            |
| Lee J       | 1           | 1 | 0 | 1 | 1 | 1 | 0 | 1 | 1 | 1  | 1  | 1  | 1  | 1  | 1  | 1  | 1  | 0  | 15            |
| Woo S       | 1           | 1 | 1 | 1 | 0 | 1 | 1 | 1 | 1 | 1  | 1  | 1  | 0  | 1  | 1  | 1  | 0  | 1  | 15            |
| Xiong H     | 1           | 1 | 1 | 1 | 0 | 1 | 0 | 0 | 1 | 1  | 1  | 1  | 1  | 1  | 0  | 1  | 1  | 0  | 13            |
| Yakata Y    | 1           | 1 | 0 | 1 | 0 | 1 | 0 | 1 | 1 | 1  | 1  | 1  | 0  | 1  | 0  | 1  | 0  | 0  | 11            |
| Deng J 2010 | 1           | 1 | 1 | 1 | 0 | 1 | 0 | 1 | 1 | 1  | 1  | 1  | 1  | 1  | 1  | 1  | 1  | 0  | 15            |
